# Supplementary material
Source: PubMed Central journal article supplement (PMC3878698)
Supplement: CJN.03930413_CJN03930413upplementaryData.pdf [file CJN.03930413_CJN03930413upplementaryData.pdf]

# Supplemental Files

---

## Appendix

---

### *Home cannulation training protocol*

Each patient was allocated one primary nurse to create the BH tract using sharp needles. Once the tract was created, blunt needles were used. Only sharp needles were used for cannulation in the RL group. Training length was individualised and continued until all parties felt confident the patient could dialyse independently at home.

The HHD prescription is individualised for each patient, although extended weekly hours haemodialysis of 24 hours or more is encouraged. Dialysis sessions were performed either overnight or during waking hours according to patient preference.

Routine practice in the HHD unit includes 3 monthly home visits with additional visits and regular telephone contact as needed. Home visits are also conducted if problems cannot be resolved over the phone.

### *Baseline data collected for the cohort study:*

| Variable                                             | Detail                                                                                       |
|------------------------------------------------------|----------------------------------------------------------------------------------------------|
| Patient demographics                                 | Age, gender                                                                                  |
| Cause of End stage kidney disease                    |                                                                                              |
| Date and modality of first renal replacement therapy |                                                                                              |
| Dialysis vintage                                     | Duration of renal replacement therapy prior to starting Home Haemodialysis                   |
| Co-morbidities                                       | Diabetes mellitus, peripheral vascular disease, chronic lung disease, cardiovascular disease |
| Dialysis information                                 |                                                                                              |
| Cannulation technique                                |                                                                                              |

|                                             |                  |
|---------------------------------------------|------------------|
| Changes in cannulation method               |                  |
| Arteriovenous fistula-related complications |                  |
| Hours per session                           |                  |
| Sessions per week                           |                  |
| Length of initial home training             | Measured in days |
| Number of home visits                       |                  |
| Returns to the unit for dialysis            |                  |

*Management of potential infections in the home training unit.*

1. If suspicion of infection: 2 sets of blood cultures and a swab from the AVF site as part of a standard septic screen to be collected.
2. Review by physician
3. Infection determined clinically by the treating physician.

**Table S1. Hazard ratios based on Time to First infection using proportional hazard models**

| Access Associated Events                    | Cannulation method                |                                   | Risk Ratio           |         |                                |         |
|---------------------------------------------|-----------------------------------|-----------------------------------|----------------------|---------|--------------------------------|---------|
|                                             | RL                                | BH                                | Univariate analysis  |         | Adjusted analysis <sup>1</sup> |         |
|                                             | Follow-up time<br>29,940 AVF-days | Follow-up time<br>83,010 AVF-days | HR<br>(95% CI)       | p value | HR<br>(95% CI)                 | p value |
| <b>Systemic Infections:</b>                 |                                   |                                   |                      |         |                                |         |
| Number                                      | 2                                 | 15                                | 2.35<br>(0.53-10.36) | 0.26    | 2.41<br>(0.54-10.77)           | 0.25    |
| <b>Local Infections:</b>                    |                                   |                                   |                      |         |                                |         |
| Number                                      | 1                                 | 17                                | 3.85<br>(0.50-29.88) | 0.20    | 4.01<br>(0.51-31.38)           | 0.19    |
| <b>Total Access Infections:</b>             |                                   |                                   |                      |         |                                |         |
| Number                                      | 3                                 | 32                                | 2.63<br>(0.79-8.82)  | 0.12    | 2.87<br>(0.85-9.69)            | 0.09    |
| <b>Fistula loss/surgical Interventions:</b> |                                   |                                   |                      |         |                                |         |
| Number                                      | 8                                 | 24                                | 1.01<br>(0.36-2.83)  | 0.99    | 0.91<br>(0.31-2.61)            | 0.86    |

Abbreviations: BH, buttonhole; RL, rope ladder; AVF, arteriovenous fistula; HR, Hazard Ratio; CI, confidence interval  
1 – analysis adjusted for patient age and diabetes status

**Table S2. Fistula Preservation: Number and Type of Access Event Requiring Surgical Intervention or leading to AVF Abandonment**

| <b>Event</b>         | <b>RL Cannulation</b> | <b>BH Cannulation</b>   |
|----------------------|-----------------------|-------------------------|
| Thrombosis           | 7                     | 13                      |
| Aneurysm             | 0                     | 3                       |
| Stenosis             | 1                     | 6                       |
| Steal Syndrome       | 0                     | 2                       |
| Rate of total events | 8(0.27/1000 AVF days) | 24 (0.29/1000 AVF days) |

Abbreviations: BH, buttonhole; RL, rope ladder; AVF, arteriovenous fistula.

AVF loss that was a consequence of access infection (2 events, all BH) were not included in this analysis.

**Table S3: Quality assessment of studies included in the systematic review**

| Author(year)                     | Study design                              | Study limitation         | Consistency                                      | Directness |
|----------------------------------|-------------------------------------------|--------------------------|--------------------------------------------------|------------|
| Struthers (2010) <sup>17</sup>   | RCT                                       | Very serious limitation  |                                                  | Direct     |
| Chow (2011) <sup>16</sup>        | RCT                                       | Serious limitations      | Minimal heterogeneity:<br>$I^2=14.5%$ , $p=0.32$ | Direct     |
| Macrae (2012) <sup>19</sup>      | RCT                                       | No/Minimal bias          |                                                  | Direct     |
| Vaux (2013) <sup>20</sup>        | RCT                                       | No/Minimal bias          |                                                  | Direct     |
| Verhallen (2007) <sup>8</sup>    | Unit analysis: Pre-post practice change   | Serious limitations      |                                                  | Direct     |
| Ludlow (2010) <sup>6</sup>       | Unit analysis: Pre-post practice change   | Very serious limitations |                                                  | Indirect   |
| Birchenough (2010) <sup>21</sup> | Individual unit: Pre-post practice change | Very serious limitations | No detectable                                    | Indirect   |
| Nesrellah (2010) <sup>22</sup>   | Individual unit: Pre-post practice change | Serious limitations      | heterogeneity: $I^2=0.00%$ ,                     | Indirect   |
| Labriola (2011) <sup>18</sup>    | Individual unit: Pre-post practice change | Serious limitations      | $p=0.81$                                         | Direct     |
| Ward (2011) <sup>24</sup>        | Individual unit: Pre-post practice change | Very serious limitations |                                                  | Direct     |
| O'Brien (2012) <sup>25</sup>     | Individual unit: Pre-post practice change | Serious limitations      |                                                  | Indirect   |
| Van eps (2010) <sup>14</sup>     | Comparison between units                  | Very serious limitations | No detectable                                    | Indirect   |
| van Loon (2010) <sup>7</sup>     | Comparison between units                  | Serious limitations      | heterogeneity: $I^2=0.00%$ ,                     | Indirect   |
| Divi (2010) <sup>23</sup>        | Comparison between units                  | Very serious limitations | $p=0.46$                                         | Direct     |

Abbreviations:

RCT: Randomised controlled trial,

Database: Ovid MEDLINE(R) <1946 to May Week 2 2013>

Search Strategy:

---

1. exp renal dialysis/ (88579)
2. exp Catheterization/ (179917)
3. 1 or 3/ (2689821)
4. buttonhole cannulation.mp. (18)
5. blunt needle.mp. (66)
6. 4 or 5 (84)
7. 3 and 6 (36)

Database Embase <1946 to May 2013>

Search Strategy:

---

1. Dialysis (145,826)
2. Catheterization (126,894)
3. 1 or 2 (270,732)
4. Blunt and ('needle'/exp OR needle) (666)
5. Buttonhole AND ('cannulation'/exp OR cannulation) (98)
6. 4 or 5 (746)
7. 3 and 6 (109)

Database: EBM Reviews - Cochrane Central Register of Controlled Trials <April 2013>

Search Strategy:

---

1. exp renal dialysis/ (3552)
2. exp Catheterization/ (7820)
3. buttonhole cannulation.mp. (2)
4. blunt needle.mp. (13)
5. 3 or 4 (15)
6. 1 and 2 (154)
7. 5 or 6 (168)

Figure S1: Search strategy used for systematic review of buttonhole cannulation versus rope ladder cannulation in Medline, Embase and the Cochrane central register of controlled trials.
